# Supplementary material for: Antibiotic Resistance Patterns and Molecular Characterization of Streptococcus suis Isolates from Swine and Humans in China
Source: PubMed Central journal article supplement (PMC10269843; doi:10.1128/spectrum.00309-23), 2023-05-08
Supplement: spectrum.00309-23-s0001.pdf [file spectrum.00309-23-s0001.pdf]

**Supplementary Materials for**  
**Antibiotic resistance patterns and molecular characterization of *Streptococcus***  
***suis* from swine and humans in China**

Chang-Zhen Wang, Min-Ge Wang, Yue-Fei Chu, Ruan-Yang Sun, Jian-Guo Li,  
Xian-An Li, Jian Sun, Ya-Hong Liu, Yu-Feng Zhou, <sup>#</sup> and Xiao-Ping Liao, <sup>#</sup>

<sup>#</sup> To whom correspondence should be addressed: Yu-Feng Zhou, [zyf@scau.edu.cn](mailto:zyf@scau.edu.cn) and  
Xiao-Ping Liao, [xpliao@scau.edu.cn](mailto:xpliao@scau.edu.cn)

**The file includes:**

**Table S1.** The information of *S. suis* isolates.

**Table S2.** Sequences of primers used for this study.

**Figure S1.** Heat map of SNP differences between human isolates and some swine isolates.

**Figure S2.** MIC distributions for the 96 *S. suis* isolates used in the current study.

**Table S1.** The information of *S. suis* isolates.

| <i>S. suis</i> isolates | Source | Year | Locations        | Lineages |
|-------------------------|--------|------|------------------|----------|
| 110                     | Swine  | 2008 | Guangdong, China | I        |
| 40                      | Swine  | 2008 | Jiangxi, China   | I        |
| 13                      | Swine  | 2009 | Guangdong, China | III      |
| S9                      | Swine  | 2011 | Guangdong, China | I        |
| S7                      | Swine  | 2011 | Guangdong, China | I        |
| S6                      | Swine  | 2011 | Guangdong, China | I        |
| S5                      | Swine  | 2011 | Guangdong, China | I        |
| S11                     | Swine  | 2011 | Guangdong, China | I        |
| S1                      | Swine  | 2011 | Guangdong, China | II       |
| S4                      | Swine  | 2011 | Guangdong, China | IV       |
| S38                     | Swine  | 2012 | Guangdong, China | I        |
| S49                     | Swine  | 2012 | Hunan, China     | I        |
| S36                     | Swine  | 2012 | Guangdong, China | I        |
| S34                     | Swine  | 2012 | Guangdong, China | I        |
| S28                     | Swine  | 2012 | Guangdong, China | I        |
| S24                     | Swine  | 2012 | Guangdong, China | I        |
| SS2-1                   | Swine  | 2012 | Jiangsu, China   | I        |
| S20                     | Swine  | 2012 | Jiangsu, China   | I        |
| S44                     | Swine  | 2012 | Guangdong, China | III      |
| S47                     | Swine  | 2012 | Fujian, China    | III      |
| S18                     | Swine  | 2012 | Fujian, China    | III      |
| S57                     | Swine  | 2012 | Anhui, China     | III      |
| S23                     | Swine  | 2012 | Guangdong, China | IV       |
| S22                     | Swine  | 2012 | Jiangsu, China   | IV       |
| S14                     | Swine  | 2012 | Guangdong, China | IV       |
| S25                     | Swine  | 2012 | Guangdong, China | I        |
| S26                     | Swine  | 2012 | Guangdong, China | I        |
| S33                     | Swine  | 2012 | Guangdong, China | I        |
| S37                     | Swine  | 2012 | Guangdong, China | I        |
| S62                     | Swine  | 2013 | Guangdong, China | II       |
| S60                     | Swine  | 2013 | Guangdong, China | II       |
| S61                     | Swine  | 2013 | Guangdong, China | II       |
| 2013-1025-2             | Swine  | 2013 | Shandong, China  | III      |
| S66-4                   | Swine  | 2015 | Guangdong, China | I        |

Continue Table S1-1

| <i>S. suis</i> isolates | Source | Year | Locations        | Lineages |
|-------------------------|--------|------|------------------|----------|
| S66-2                   | Swine  | 2015 | Guangdong, China | I        |
| S66-1                   | Swine  | 2015 | Guangdong, China | I        |
| S71                     | Swine  | 2015 | Anhui, China     | I        |
| S69-1                   | Swine  | 2015 | Anhui, China     | I        |
| S68-2                   | Swine  | 2015 | Anhui, China     | I        |
| S68-1                   | Swine  | 2015 | Anhui, China     | I        |
| S65                     | Swine  | 2015 | Guangdong, China | II       |
| S67-2                   | Swine  | 2015 | Shandong, China  | III      |
| S69-2                   | Swine  | 2015 | Anhui, China     | III      |
| S64-1                   | Swine  | 2015 | Zhejiang, China  | III      |
| xiaosheng               | Swine  | 2015 | Anhui, China     | IV       |
| S66-3                   | Swine  | 2015 | Guangdong, China | I        |
| S66-5                   | Swine  | 2015 | Guangdong, China | I        |
| S68-3                   | Swine  | 2015 | Anhui, China     | I        |
| S68-4                   | Swine  | 2015 | Anhui, China     | I        |
| S70                     | Swine  | 2015 | Anhui, China     | I        |
| 56                      | Swine  | 2016 | Jiangsu, China   | I        |
| S8                      | Swine  | 2016 | Anhui, China     | III      |
| NF-2                    | Swine  | 2016 | Anhui, China     | III      |
| SS2                     | Swine  | 2016 | Chongqing, China | III      |
| Z16L                    | Swine  | 2017 | Guangdong, China | I        |
| S89                     | Swine  | 2017 | Jiangsu, China   | I        |
| S84                     | Swine  | 2017 | Hunan, China     | I        |
| S98-1                   | Swine  | 2017 | Guangdong, China | I        |
| S78                     | Swine  | 2017 | Fujian, China    | I        |
| S86                     | Swine  | 2017 | Jiangsu, China   | I        |
| S88                     | Swine  | 2017 | Jiangsu, China   | III      |
| S93-1                   | Swine  | 2017 | Chongqing, China | III      |
| S91                     | Swine  | 2017 | Jiangsu, China   | III      |
| S82                     | Swine  | 2017 | Hunan, China     | III      |
| S80                     | Swine  | 2017 | Fujian, China    | IV       |
| S94                     | Swine  | 2017 | Guangdong, China | IV       |
| S79                     | Swine  | 2017 | Fujian, China    | I        |
| S98-2                   | Swine  | 2017 | Guangdong, China | I        |
| S119                    | Swine  | 2018 | Anhui, China     | I        |
| S110                    | Swine  | 2018 | Anhui, China     | I        |

Continue Table S1-2

| <i>S. suis</i> isolates | Source | Year | Locations        | Lineages |
|-------------------------|--------|------|------------------|----------|
| S120-2                  | Swine  | 2018 | Guangdong, China | I        |
| S116-1                  | Swine  | 2018 | Anhui, China     | I        |
| S115-2                  | Swine  | 2018 | Anhui, China     | I        |
| S101-1                  | Swine  | 2018 | Anhui, China     | I        |
| S100                    | Swine  | 2018 | Anhui, China     | I        |
| S102-5                  | Swine  | 2018 | Anhui, China     | I        |
| S102-4                  | Swine  | 2018 | Anhui, China     | I        |
| S127                    | Swine  | 2018 | Anhui, China     | II       |
| S123                    | Swine  | 2018 | Shandong, China  | II       |
| S109                    | Swine  | 2018 | Anhui, China     | III      |
| S103                    | Swine  | 2018 | Anhui, China     | III      |
| S108                    | Swine  | 2018 | Anhui, China     | III      |
| S113                    | Swine  | 2018 | Guizhou, China   | III      |
| S122                    | Swine  | 2018 | Shandong, China  | IV       |
| S111                    | Swine  | 2018 | Anhui, China     | IV       |
| S125-2                  | Swine  | 2018 | Shandong, China  | I        |
| SS18-11                 | Human  | 2019 | Guangdong, China | I        |
| SS18-7                  | Human  | 2019 | Guangdong, China | I        |
| SS18-6                  | Human  | 2019 | Guangdong, China | I        |
| S71-1                   | Swine  | 2019 | Guangdong, China | III      |
| 41                      | Swine  | 2019 | Guangdong, China | III      |
| S64-2                   | Swine  | 2019 | Zhejiang, China  | III      |
| S42                     | Swine  | 2019 | Guangdong, China | III      |
| S130                    | Swine  | 2019 | Guangdong, China | IV       |
| S35                     | Swine  | 2019 | Guangdong, China | I        |
| S71-2                   | Swine  | 2019 | Guangdong, China | I        |

**Table S2.** Sequences of primers used for this study.

| Primer designation       | Sequence (5'-3')       | Product size(bp) | Reference or source |
|--------------------------|------------------------|------------------|---------------------|
| <i>erm</i> (B)_fw        | AAGTACTCAACCAAATAATA   | 651              | This study          |
| <i>erm</i> (B)_rv        | ACAATACTTGCTCATAAGTA   |                  |                     |
| <i>tet</i> (M)_fw        | TCTGCCGAAATTGTAATCAA   | 759              | This study          |
| <i>tet</i> (M)_rv        | GTGCACTAATCACTTCCATT   |                  |                     |
| <i>tet</i> (O/W/32/O)_fw | GTGGATGGTATATTCTGCTT   | 1083             | This study          |
| <i>tet</i> (O/W/32/O)_rv | GTGGATGGTATATTCTGCTT   |                  |                     |
| <i>Cps</i> 2_fw          | TTCGTATTAACTTACTTGGCGT | 363              | (1)                 |
| <i>Cps</i> 2_rv          | TAAATCCCCATATGCCAAATCC |                  |                     |
| ICESsuS20_fw             | AATAGCCACGAGATGACACA   | 1648             | This study          |
| ICESsuS20_rv             | GCGATAAGCGATTGATAGAA   |                  |                     |
| ICESsuS4-1_fw            | ACTTGAAACTTGAATCAAAG   | 1743             | This study          |
| ICESsuS4-1_rv            | TTCAATTAGTGACAGGTGTT   |                  |                     |
| ICESsuS4-2_fw            | GATTAATCCACTGATGAGCC   | 386              | This study          |
| ICESsuS4-2_rv            | AGGCTTTACGAGTTCAGAAG   |                  |                     |
| ICESsuS4-3_fw            | GAATGGTGGTGTCAACTGAT   | 2569             | This study          |
| ICESsuS4-3_rv            | AGACAGGGACAAGTCCACAA   |                  |                     |
| ICESsuS4-4_fw            | TCTGGAACGGTATCTTCTAG   | 485              | This study          |
| ICESsuS4-4_rv            | TTAGGCTAGGGTTGGAATCA   |                  |                     |
| ICESsuS82-1_fw           | AACATGTGCCACTTTATCAT   | 2609             | This study          |
| ICESsuS82-1_rv           | CATAAGATTAGTCACTGGTA   |                  |                     |
| ICESsuS82-2_fw           | TGACTGCGATTAAACCTCCT   | 1410             | This study          |
| ICESsuS82-2_rv           | ACGGTTGAGTCAATATGACA   |                  |                     |
| ICESsuS82-3_fw           | ATTAATGAGGACACCATCCG   | 513              | This study          |
| ICESsuS82-3_rv           | CCTTAACAGTTGATGCCTTA   |                  |                     |
| ICESsuS82-4_fw           | AGTTGACCCTAAACTTTCAG   | 524              | This study          |
| ICESsuS82-4_rv           | CTGATAATCAGGTCATCCAC   |                  |                     |

*Continue Table S2*

| Primer designation   | Sequence (5'-3')      | Product size(bp) | Reference or source |
|----------------------|-----------------------|------------------|---------------------|
| ICESsuS82-5_fw       | CTTGCCATCCATAGGAGCCA  | 5212             | This study          |
| ICESsuS82-5_rv       | GTGCTGGCGGATACTGAAGA  |                  |                     |
| ICESsuS82-6_fw       | GCCATCAGATTTGAATTGGA  | 292              | This study          |
| ICESsuS82-6_rv       | GATGAATTGGAACAAGTAGG  |                  |                     |
| ICESsuS113-1_fw      | CGATTGCTTGAATCAATGC   | 4609             | This study          |
| ICESsuS113-1_rv      | CTGATAATCAGGTCATCCAC  |                  |                     |
| ICESsuS113-2_fw      | GGGATTTCACTTGCAGATGT  | 3918             | This study          |
| ICESsuS113-2_rv      | TCGAAAGAGTGATGAAATGC  |                  |                     |
| ICESsuS113-3_fw      | TTCTGCACCTAGTCGATCAA  | 3785             | This study          |
| ICESsuS113-3_rv      | ATACTCCGTCAGGTTTGATT  |                  |                     |
| ICESsuS47-1_fw       | ATG TTCAGCTAAAGTGAAGG | 1773             | This study          |
| ICESsuS47-1_rv       | TGAGTGGTAACCAACTACAG  |                  |                     |
| ICESsuS47-2_fw       | CCCTCCAAGACTAATATTCC  | 1284             | This study          |
| ICESsuS47-2_rv       | GTTGTGGAGGTAATCATGCA  |                  |                     |
| <i>optrA_circ_fw</i> | TTGCGTTAGTACTAGCAATT  | 2955             | This study          |
| <i>optrA_circ_rv</i> | AATGGGAACAGTTGATGAGA  |                  |                     |

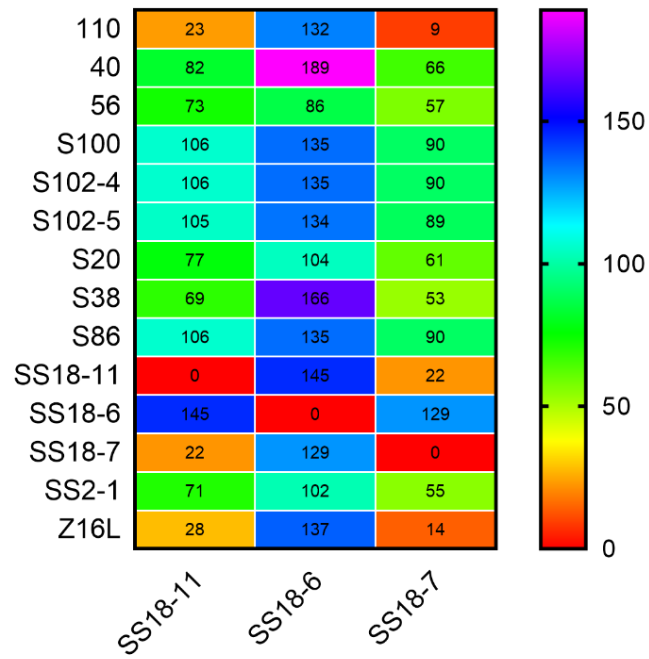

**Figure S1.** Heat map of SNP differences between human isolates and swine isolates in this study. The numbers represent SNPs shared between these two strain groups.

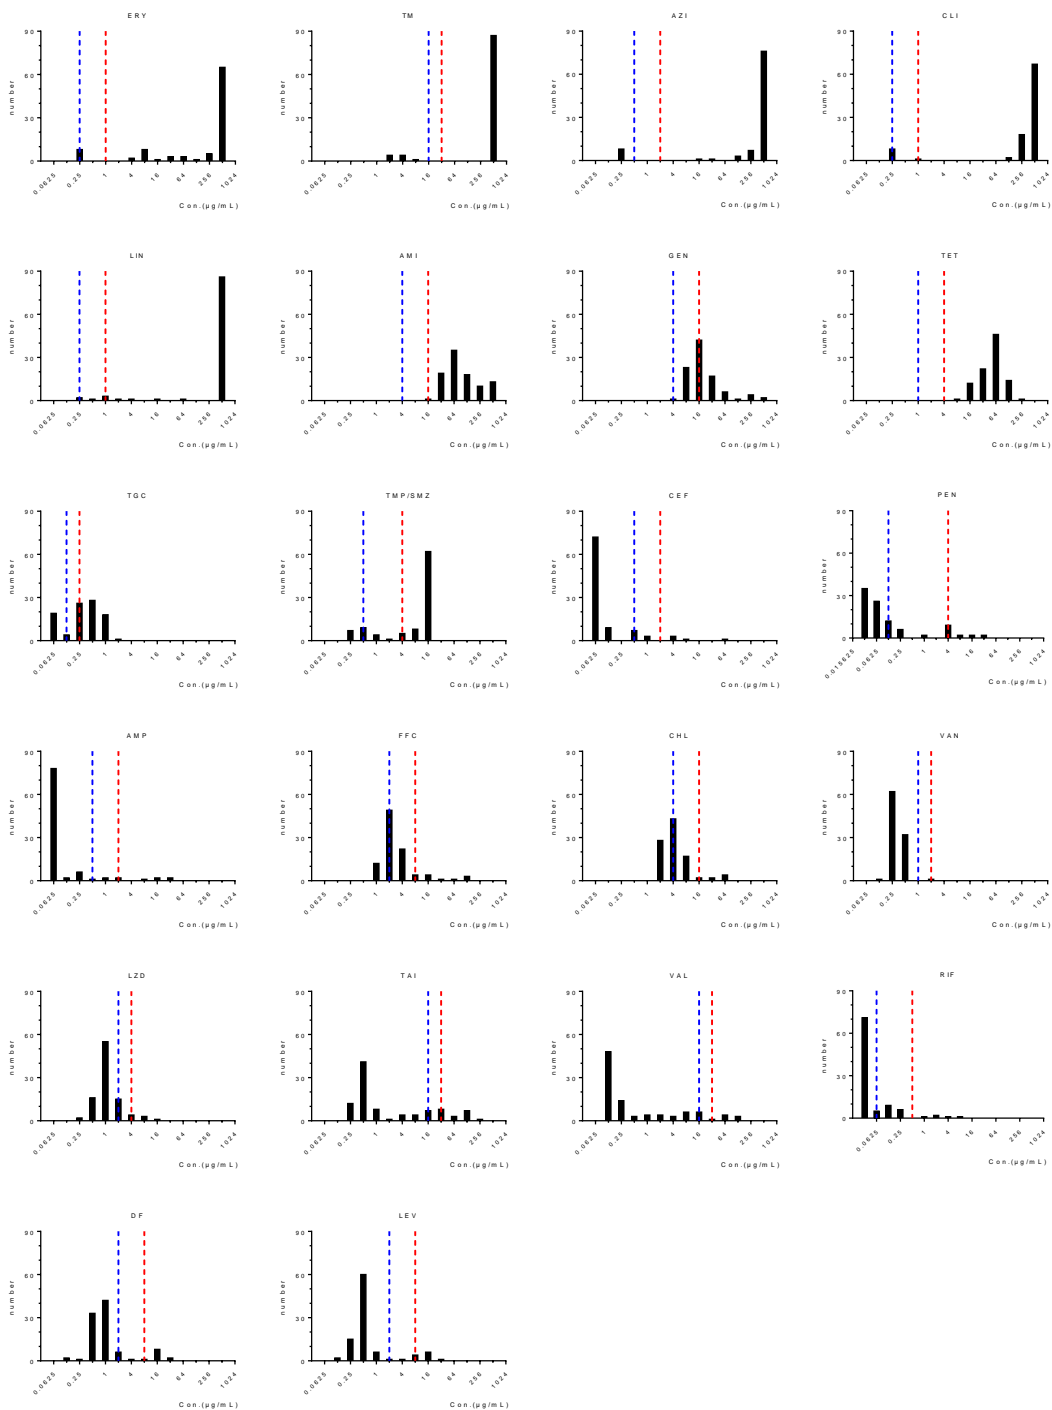

**Figure S2.** MIC distributions for the 96 *S. suis* isolates used in the current study. Blue and red lines indicate susceptible and resistant cutoffs, respectively. ERY, erythromycin; TM, tilmicosin; AZI, azithromycin; CLI, clindamycin; LIN, lincomycin; AMI, amikacin; GEN, gentamicin; TET, tetracycline; TGC, tigecycline; TMP/SMZ, trimethoprim/sulfanilamide; CEF, ceftiofur; PEN, penicillin; AMP, ampicillin; FFC, florfenicol; CHL, chloramphenicol; VAN, vancomycin; LZD, linezolid; TAI, tiamulin; VAL, valnemulin; RIF, rifampicin; DF, danofloxacin; LEV, levofloxacin. Except for



ampicillin, rifampin and tigecycline, which were interpreted using the EUCAST breakpoints (2) and tilmicosin, lincomycin, amikacin, gentamicin, florfenicol, tiamulin and valnemulin referred to a previous study (3), the CLSI criteria were applied for interpretation of the resistance profiles (4).

## REFERENCES

1. Qiu X, Bai X, Lan R, Zheng H, Xu J. 2016. Novel Capsular Polysaccharide Loci and New Diagnostic Tools for High-Throughput Capsular Gene Typing in *Streptococcus suis*. *Appl Environ Microbiol* 82:7102-7112.
2. The European Committee on Antimicrobial Susceptibility Testing. 2020. Breakpoint tables for interpretation of MICs and zone diameters. version 100.
3. Wang X, Sun J, Bian C, Wang J, Liang Z, Shen Y, Yao H, Huang J, Wang L, Zheng H, Wu Z. 2021. The population structure, antimicrobial resistance, and pathogenicity of *Streptococcus suis* cps31. *Vet Microbiol* 259:109149.
4. Clinical and Laboratory Standards Institute. 2015. Performance standards for antimicrobial susceptibility testing; 25th informational supplement. CLSI document M100-S25 Clinical and Laboratory Standards Institute, Wayne, PA.
